# Supplementary material for: Interaction of bZIP transcription factor TGA6 with salicylic acid signaling modulates artemisinin biosynthesis in Artemisia annua
Source: PubMed Central journal article supplement — J Exp Bot. 2019 Apr 11;70(15):3969–79. doi: 10.1093/jxb/erz166 (PMC6685660; doi:10.1093/jxb/erz166), 2019-04-11
Supplement: erz166_supplsupplementary_figures_s1-s9_table_s1.pdf [file erz166_supplsupplementary_figures_s1-s9_table_s1.pdf]

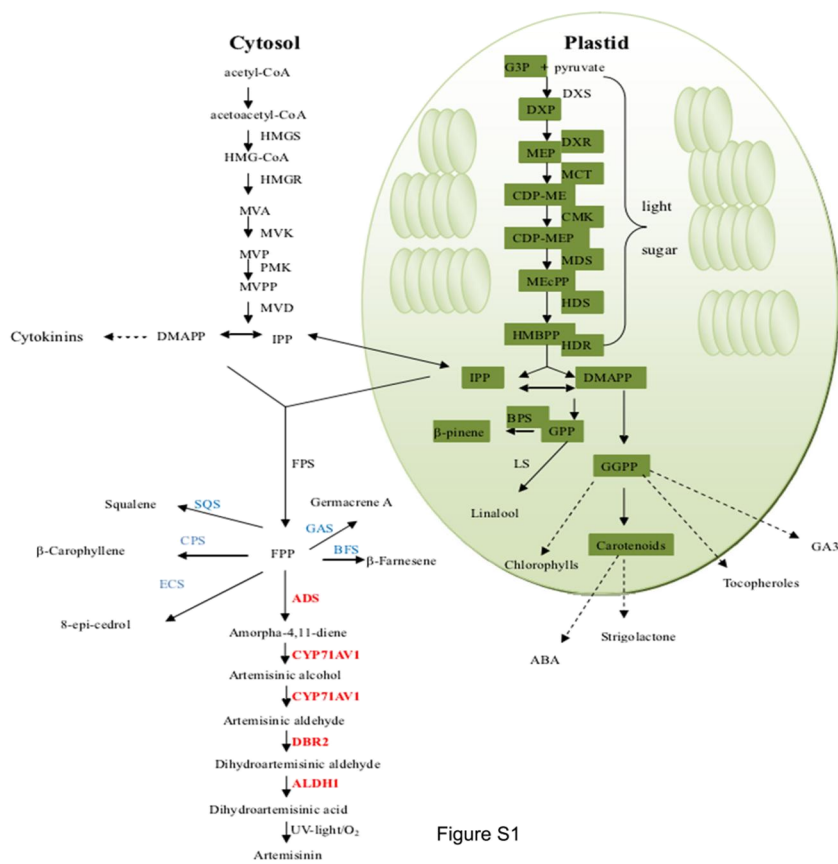

Figure S1

Figure S1 The artemisinin biosynthesis pathway in *A. annua*. Branch pathway genes are marked in blue, and artemisinin biosynthesis genes are marked in red. ADS, amorpha-4,11-diene synthase; ALDH1, aldehyde dehydrogenase 1; BFS,  $\beta$ -farnesene synthase; CPS,  $\beta$ -caryophyllene synthase; CYP71AV1, amorphadiene-12-hydroxylase; DBR2, artemisinic aldehyde  $\Delta$ 11(13) reductase; FDS, farnesyl diphosphate synthase; GAS, germacrene A synthase; HMGR, 3-hydroxy-3-methyl-glutaryl coenzyme A reductase; HMGS, 3-hydroxy-3-methyl-glutaryl coenzyme A synthase; SQS, squalene synthase; DXR, 1-deoxy-D-xylulose-5-phosphate reductoisomerase; DXS, 1-deoxy-D-xylulose-5-phosphate synthase.

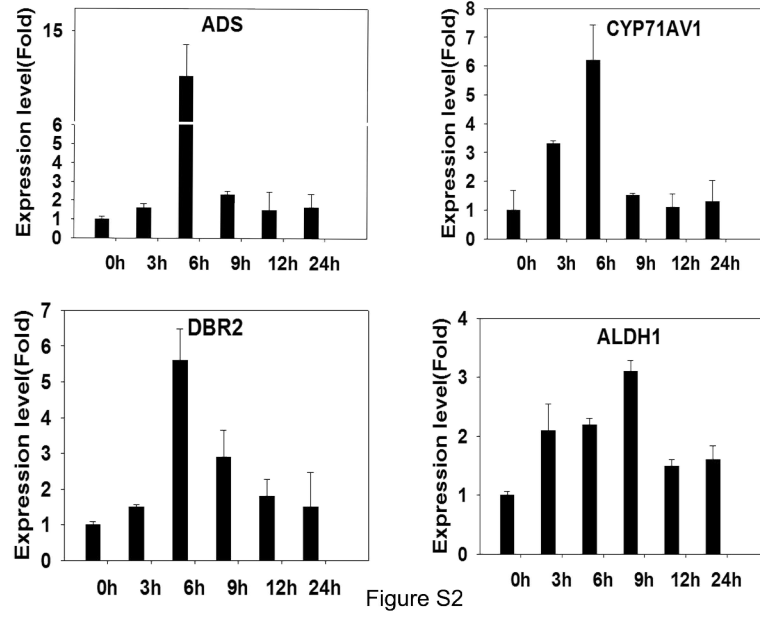

Figure S2 Expression levels of *ADS*, *CYP71AV1*, *DBR2* and *ALDH1* under SA treatment.  $\beta$ -*ACTIN* was used as an endogenous reference gene. Error bars indicate SE (n = 3).

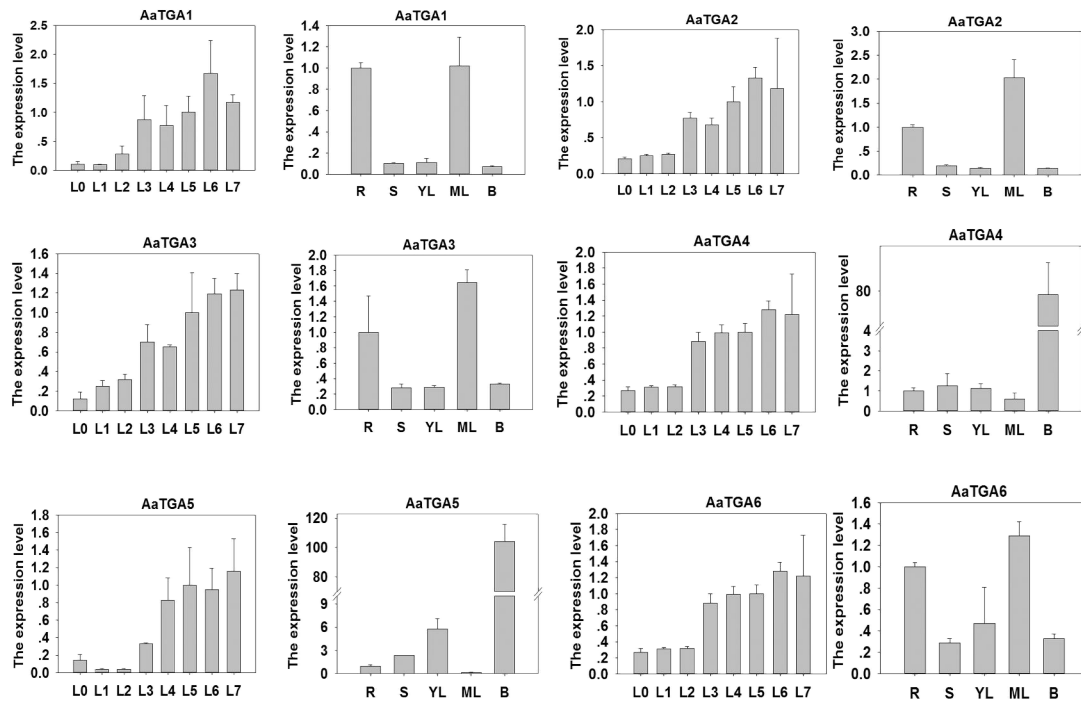

Figure S3

Figure S3 The expression levels of *AaTGA1*~*AaTGA6* in the leaf0~leaf7(L0~L7) and roots (R), stems (S), leaves (L) and buds (B).  $\beta$ -*ACTIN* was used as endogenous reference gene. Error bars indicate SE (n = 3).

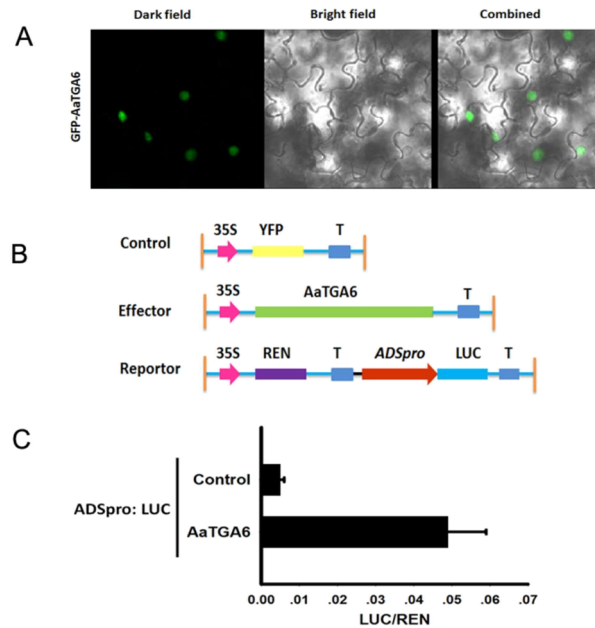

Figure S4

Figure S4 Subcellular location and transient dual-LUC assay of AaTGA6.

(A) Subcellular location assay indicates that AaTGA6 is located in the nuclear. AaTGA6 localizes to the nucleus. The ORF of AaTGA6 was fused with the C-terminal of YFP in YFP-PHB vector, and the AaTGA6 was driven by 2×35S promoter. The plasmids were delivered into tobacco leaves by *A. tumefaciens* infiltration. (B) Schematic illustration of the reporter and effector constructs used in the transient dual-LUC assays. (C) Transient dual-LUC analysis shows AaTGA6 activation of the transcription level of *ADS*. LUC/REN represents luciferase/Renilla ratio, n = 3 independent experiments.

>pro-AaERF1

gagttggaatcgtgttaccacgtccatgcaatgtcaagtaacgcaatttgatattgatgccagaaccacataagaaatcacaacaaaatc  
cacacgctaacatgtcaaccaatgatttgcttaaatagagagaagaaagagaaattatagtaaaattcaccaatcagtcctatgatattactc  
gtagttgttaatacaagaatacagaattaacgaagtataataaatttttaatatatcctaagccttctaagcataagatagtaacacat  
gtcaaatagacgaaaaagagtaaaataattgatttcttctattttatgaggcgaccagctactttaagtaacaggtgtataatTTTTTct  
cgagatggaataaaagaaaaatgaactaaaatgtatgattttataaaattagtaaaacaaattaagaaaaacatatatttctttgatattag  
tcgaataactaaatacgtcatgtatttgtgtgacacaaaattcgagaccagattcatttaaaaaagtcaaaatTTTatgaagtttacacaat  
gcgataaatatccatcggaacccaaaacccttaggtccgcattggattcatgctgttactcttttaccgatcacaatattgaaatctt  
atgctcttaattacctatcttatgatcatatgcatcacaatcataagataagataaataattaactactatcacaataagtctaagcttga  
atatccctccaccacaaaagaaaatctcaaccaacttattcgatattcaacatgatattcacaataaccctttttcaaaacagtagatag

catcaccaaatcacccaatattatacctcggttcacattagagaatgtaaagttcctaattaaattcaactatataatcatcattggaaaaca  
tgttgatacacatggttttaccaactttaacctttg<sup>cgctca</sup>tttctaactgaactgactaatattataagtagtttgattgacatgcttgtt  
tagcgttatataatgttagaactgttcccactcgcactccgattcaatcctaactcgtaaaaacttatataaaataagaccaaccaacga  
acttgaccggggtgtcatagttgttatcgacttggctttttgtatatcagctataatcctatagaaaaacgaacatTTTTCTTTTgtttat  
aatctcgtataaaataatagaatgat<sup>cgctca</sup>agcca<sup>tgacgtca</sup>cccctaactcctaattggtcgtacattcaccacgtgatttaaaat  
aaatctttgtctttgcttgcgttgcgttatcaagttgcccactgcccacgatacgaacttctactccacccttcttccactattacattacatt  
caccctccaatatttccatataaaacaccattatcttctttattccaaaaatttttcttcaattctaataacccttcaaaaaacataaaa  
aacccatatttataaa

>pro-AaERF2

tgagagcagatgggtggccacaagcccataactctgatgaattaaagcgtactaatacaataaaacaaaactacttaatgaattaaatata  
tgaggaccttctacagctctaataatctcgtttgaggtgtgttctgtgatgcttctcactgaattcgtctccttaggggtggtgcacaca  
aattcgtataagcttgggtatttatagtttctgtctaaggacacgatggcgcatcgagtaagtagatacggcgcatgacttaactcgtg  
tgggtccaagattaacatattctggaatatccgtacaccgtctcagatggcgctatcttgatcttgatggcgcatgcttctcagatctt  
ggattgttctgatgaagtcttgatgatacgcgtatatacagaagataatggcgctatctggagtagaacaagcttgatcttctcgtt  
accaaagttcatatggcgcatgatagaattacatggcgcatcttcaaagtcaggcaatggtcttgaattcatcaagtagatgatattg  
cggcgtatctggtgagagatacggcgcatcttctggattcagatactttgacatcttctagttttgctccataattcgtccaaaatgcc  
aagttttaccaattgcttgtttttacctgagaaatataaagtaaaacaattaagatcaattctcataaataataataaaacaagtaaaata  
aatagggtaaatgatgacaataatgtacttattgatttcatcaggttgccacgtgtgttttagctgcaaaactagtaagactttgcaaattg  
gtcattgaaataaagttggctagtaaaaggcgggaaacagagtgaaatggcgataatacccttgactaacgggataactaacaggcgttag  
aaaaaagttggtctcgtggctttttgcaaaaaatggtacgctaattgctttttgcatgccttttctcgggtgcttttttctcattgac  
aacgttagtgactaaattgcaattacccttattttaaaaagtaagctttattataaattcacacaaactgttctagtcacgccctaaatt  
tgcaaaaaactcattttggaacaataaaataagatgcaagaatctagaccaaatgactattttgaagtattctacataaggagttcatagt  
ttgttttaaggcaactgtgagtttcaaaaataagctactcttgattaattttagttttgttttaagctattttacttttaagtgctgaagatt  
aaatattaacccattcacctttaacgcatatgttatgggtggaacaataaattgcaacaagtttatacgtagtgaaattagttataattat  
gaaaaaacatcgccattaatcattatgaatactcttgcaatggtttttctcaacgcttcaactaaaggtaattgttaacgtaatggtatt  
tagtatttacaccacacaaaataaattcaataactcttcaaaaagggttagaaagtaagcaagaccaagaatctactgctccgttagtt  
tcttaatggatagattattttaaaatacatttattggatagaaagtgataaggacactagaaagccaagaccaagaattactgttgcct  
ccattcttatccacgaacgtcccaaacatactaatcttcttactcactcatcattatataaatcacgctccacataaccacaatatccact  
caaattcaacaattctcaaacacaaaaa

>pro-AaORA

ctgagtgaaacagttgctcaatgagtcaccttcaggatgccaaggatgagcctaagaagaaagcctctcactcagtgaggcggatctcagtg  
agtggtcatgttagccaaagaagaaggtgatgggtcaatgaggatgacaataactcactgaacccaagactcctcaacaactaaagaa  
gtatgactaaagactgaagaatgaaggcctaaggactgaagattaggcgggagggaagtttgaagagataagatgttgccttatca  
cctgaagtcaaaactacctgaaaggcaaatgtcaggacagtgatcactgctactcagaaaggagaattgtcttatgcccaaatagc  
ctaatgtaacagagacaaaatacgttaagttttgtctcactagcttaggtcactcctcacaagaacaactagtcctgagatagctca  
gtaggaccttagttgctactctagcttagctttagagaggagtcataccacactgtcatttcaatccaagtgttgtccgcaaacact  
tgggtataattctttgattgattataaagaattaaacattgaaaaatcgtgtctacttcttacttcttctcagatatttcaaaagtt  
tcaacacacttaagcatggtgacgtttaaactaacttttagttagttatccgtgtaaaccgggaccaacaacactctgtagacattat  
aaaaaccgtaagtataatcttattattgaccattattataatggtgaaaaccctagatgccctaaaccacgtactcctaatacatacatgc  
aaagaatataattttgagattaacgacttatatttgaactacaaccaatcaacaaacgaaggtgtgcatgtcctcatagatcttattctaaa  
gtgtaaacatacatgatagtttccatgagattattgggtgaaatagttatacagatataacattcatacatattaaaaggaaaatcca  
acaaaactgagctaggaggtcattgaaattgttatctagtaaagtagtatagcaataagtcattgttagcaattaattcttcaaaagtagt

ctaataactttcttttgtgaatgaacgatatacgattacttttctataaaagctagcttcaatat

Figure S5 The promoter sequences of *AaERF1*, *AaERF2* and *AaORA*.

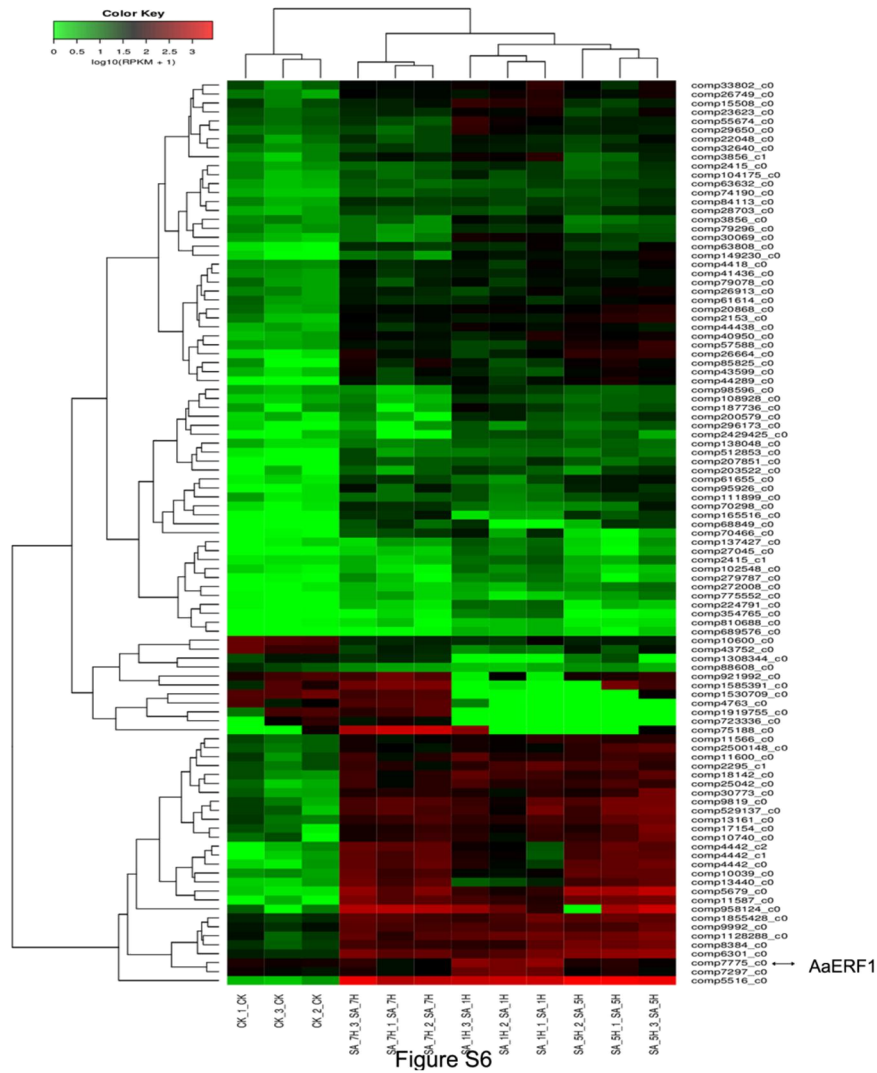

Figure S6 Expression heat map of SA-related genes in *A. annua*. The heat map shows the RPKM change of 101 genes expressed in 30-day-old *A. annua* under the treatment of SA (100 $\mu$ M) at the time points of 1 h, 5 h and 7 h. The color scale at the top represents the value of RPKM (red represents high expression and green represents low expression).

A

|         |        |          |                          |                   |
|---------|--------|----------|--------------------------|-------------------|
| C-box3  | caagcc | A        | <u>TGACGTCA</u>          | ccctaatacctaataat |
| Mutant1 | caagcc | A        | <u>TGACGTC</u> <b>g</b>  | ccctaatacctaataat |
| Mutant2 | caagcc | A        | <u>TGACGT</u> <b>a</b> A | ccctaatacctaataat |
| Mutant3 | caagcc | <b>g</b> | <u>TGACGTCA</u>          | ccctaatacctaataat |

B

|         |   |   |   |   |
|---------|---|---|---|---|
| AaTGA6  | + | + | + | + |
| C-box3  | + | - | - | - |
| Mutant1 | - | + | - | - |
| Mutant2 | - | - | + | - |
| Mutant3 | - | - | - | + |

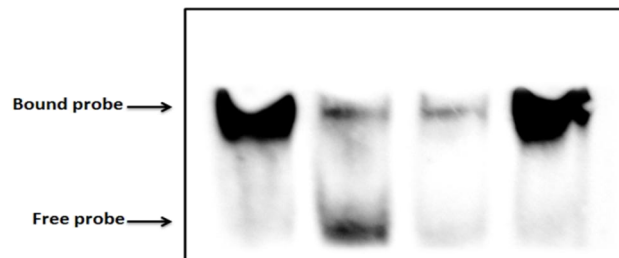

Figure S7

Figure S7 EMSA assay to test the binding of AaTGA6-His to the mutant “TGACG” motifs in the promoter of the *AaERF1* gene. (A) The mutant “TGACG” sequences. (B) The binding of AaTGA6-His to the mutant “TGACG” sequences.

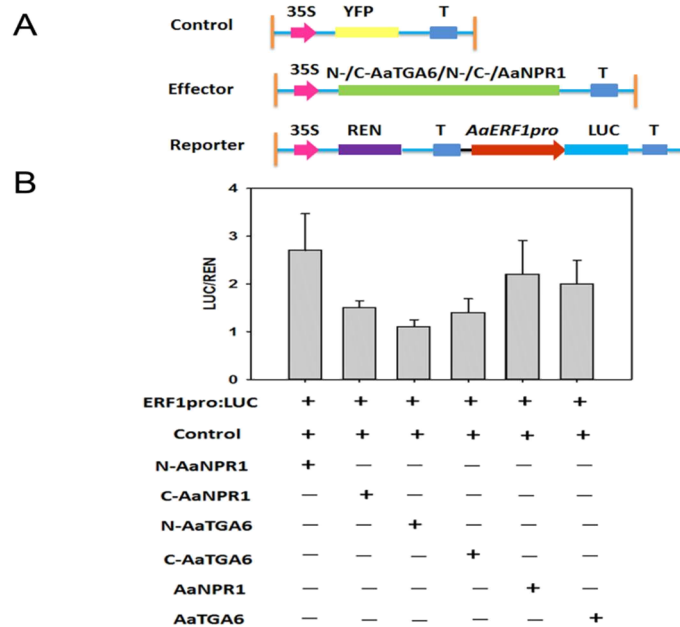

Figure S8

Figure S8 N-AaNPR1 can activate the promoter of *AaERF1*.

(A) Schematic illustration of the reporter and effector constructs used in the transient

dual-LUC assays. (B) Transient dual-LUC analysis showed that N-AaNPR1 can activate the promoter of *AaERF1*. LUC/REN represents the luciferase/Renilla ratio, n=4 independent experiments. \*P<0.05.

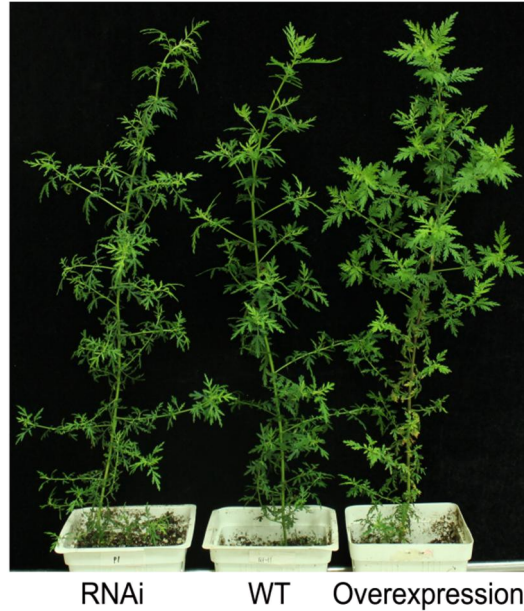

Figure S9

Figure S9 The phenotype of *A. annua* transgenic plants. The phenotype of three-month-old seedlings of wild type (WT), RNAi (AaTGA6-phellsgate) and overexpression (2×35S::AaTGA6) *A. annua* plants.

Table S1 Sequence of primers

| primers  | Primers sequence(5'-3')  |
|----------|--------------------------|
| AaTAG1-F | atggatactagatcatttgg     |
| AaTGA1-R | ttattgtattgtttatctctctgc |
| AaTAG2-F | atgaattcatgtccactcag     |
| AaTGA2-R | tcacaaagccggttcac        |
| AaTAG3-F | atggcatcaacatctacacaa    |
| AaTGA3-R | ctagctcatgcgttcacgag     |
| AaTAG4-F | atgacaggcacaactagtgtt    |
| AaTGA4-R | ctaagtagcgtccctttttg     |
| AaTAG5-F | atgaccaccaacaacaataat    |
| AaTGA5-R | ctataaagttaaaatgtttgc    |
| AaTAG6-F | atgggtagcaaaagcttgaag    |
| AaTGA6-R | ttactctgtgggcgagcaag     |
| AaNPR1-F | atggatgtagaaatgggttt     |
| AaNPR1-R | ctatnttgggattgggaactg    |

|                             |                                              |
|-----------------------------|----------------------------------------------|
| AaNPR2-F                    | atgttaaaaatgcagcgacgc                        |
| AaNPR2-R                    | tcacgagtatttccgagatctg                       |
| AaNPR3-F                    | atgctactgaagattcattg                         |
| AaNPR3-R                    | ctaatactcatgatgagaatg                        |
| AaNPR4-F                    | cttgaaaattgttatgattg                         |
| AaNPR4-R                    | ctagagagtctaataggccaa                        |
| AaNPR5-F                    | atggaatacttagccatggaa                        |
| AaNPR5-R                    | gcgctttattctttccacca                         |
| AaNPR1-BD-F                 | tggccatggaggccgaattc atggatgtagaaatgggtt     |
| AaNPR1-BD-R                 | cgctgcaggtcgacggatccctatttgggattgggaactg     |
| AaTAG6-AD-F                 | ccg gaattc atggtagcaaaagctgaag               |
| AaTGA6-AD-R                 | cgc g gatcc t ttactcttgtggcgagcaag           |
| AaTAG6-42AD-F               | ccg gaattc atggtagcaaaagctgaag               |
| AaTGA6-42AD-R               | agctcgag ttactcttgtggcgagcaag                |
| PAaERF1-F                   | cgtgtaccacgtccatgcaa                         |
| PAaERF1-R                   | ttttaaataatgggtttttatgtt                     |
| pADS-F-BamHI                | gcggatccggggcataagaacatac                    |
| pADS-R-KpnI                 | gcggtaccgaaagacagtagcacactcaata              |
| AaNPR1-pet28a-F             | cgaattcgagctccgtcgacatggatgtagaaatgggtt      |
| AaNPR1-pet28a-R             | tcgagtcggccgcaagctttttgggattgggaactgagcaggg  |
| AaTAG6-pet28a-F             | cagcaaatgggtcgcgatccatggtagcaaaagctgaag      |
| AaTGA6-pet28a-R             | ttgtcgacggagctcgaattccttcttggcgagcaagccaaaga |
| pAaERF1-box-f               | aatgatgcgtcaagccatgacgtcacccctaatacctaataat  |
| pAaERF1-box-r               | atttaggattaggggtgacgtcatggcttgacgcatcatt     |
| Q- AaERF1-PF                | tagtagccttgtcccttgtt                         |
| Q- AaERF1-PR                | taaacggagtccatccaaca                         |
| Q-AaTAG1-F                  | gaggtccagcacagaa                             |
| Q-AaTGA1-R                  | accagaagcccataaa                             |
| Q-AaTAG2-F                  | tctggctgacgctgtg                             |
| Q-AaTGA2-R                  | ccgctgaataacaagtc                            |
| Q-AaTAG3-F                  | gccacaagactgaat                              |
| Q-AaTGA3-R                  | taagtaaaccgcata                              |
| Q-AaTAG4-F                  | tctcagccgcaaatca                             |
| Q-AaTGA4-R                  | tccacaagaacgcatc                             |
| Q-AaTAG5-F                  | ctaaccgagtccta                               |
| Q-AaTGA5-R                  | ttgaatccaccaatcc                             |
| Q-AaTAG6-F                  | aactgggaggattga                              |
| Q-AaTGA6-R                  | ttgaagttggtggaa                              |
| ox- <b>AaTGA6</b> - BamH1-f | cgcgatccatgggtagcaaaagctgaag                 |
| ox- <b>AaTGA6-xba1-r</b>    | tgctctagattactcttgtggcgagcaag                |
| Q-AaNPR1-PF                 | GTTTGGATAAGCCTGGAA                           |
| Q-AaNPR1-PR                 | CAGCATAGGCGACAGC                             |
| Q-AaNPR2-PF                 | CCAAGTGAAGCGAAAC                             |



|               |                                          |
|---------------|------------------------------------------|
| Q-AaNPR2-PR   | AATGAGGGAAGAAACG                         |
| Q-AaNPR3-PF   | CAGACCCTAATGTTTCG                        |
| Q-AaNPR3-PR   | GAGTTCAAGGCAAAGC                         |
| Q-AaNPR4-pF   | ATAAGTGGTTGTGGGAGT                       |
| Q-AaNPR4-pR   | CATCTGTGGGTTCTGC                         |
| Q-AaNPR5-PF   | GCCCAAACAACCTCCG                         |
| Q-AaNPR5-PR   | CGCCTACCCATCTCCA                         |
| <b>EMSA-F</b> | aatgatgegtcaagccaTGACGtcaccctaatacctaaat |
| <b>EMSA-R</b> | atttaggattaggggtgacgtcatggcttgacgcatcatt |
